# Supplementary material
Source: publisher site journal article supplement (https://www.spandidos-publications.com/2631/downloadSupplementary)
Supplement: Supplementary file 1 [file downloadSupplementary]

Figure S1. miR-34b-5p reduces RB cell migration and invasion. (A) Migration and (B) invasion assays were performed in Y79 and Weri-Rb-1 RB cells transfected with miR-34b-5p or control miR (magnification, x400). \* $P < 0.05$  vs. control miR. miR, microRNA; RB, retinoblastoma.

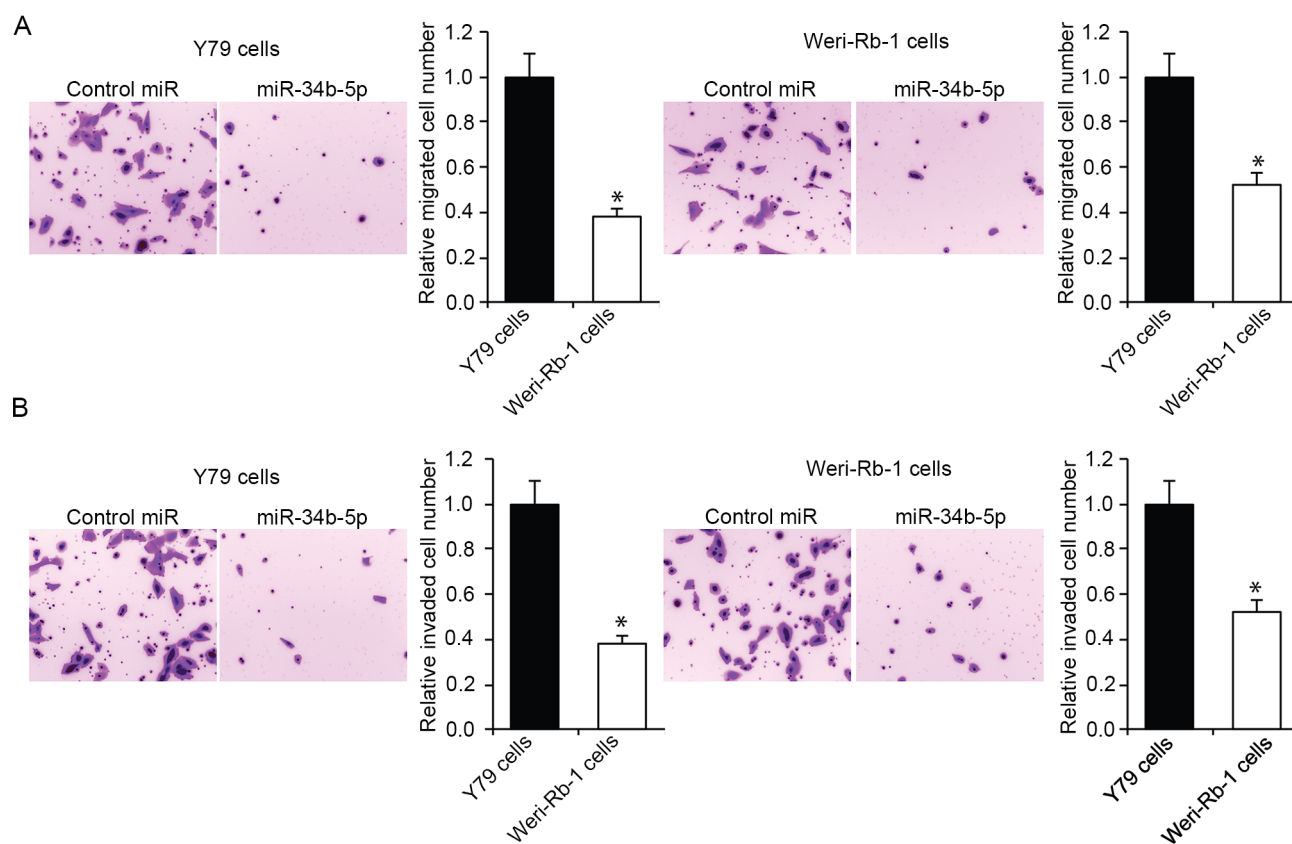

Figure S2. Expression of Notch1 and Notch2 in RB cells after plasmid transfection. Overexpression of Notch1 and Notch2 in Y79 RB cells following transfection with Notch1 or Notch2 plasmid was verified by western blotting. RB, retinoblastoma. The density of CD133, Sox-2 and Nanog was quantified relative to  $\beta$ -actin. \* $P < 0.05$  vs. Vector.

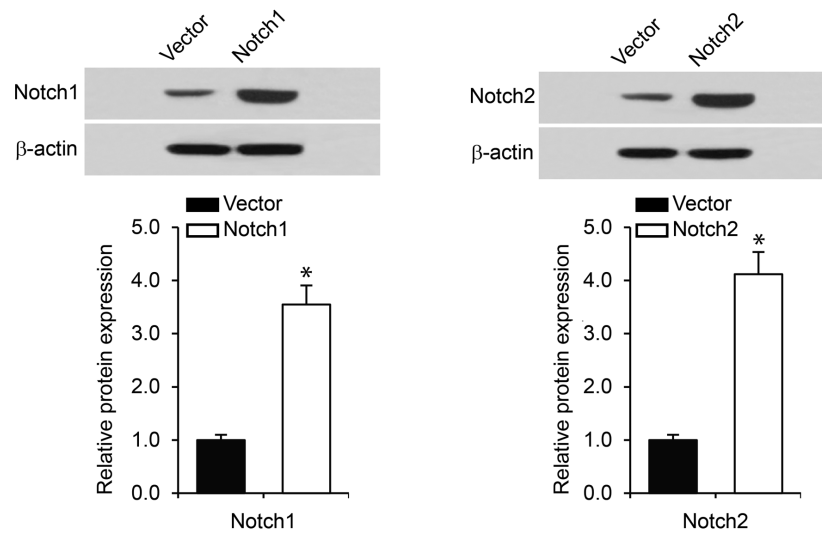

Table SI. Clinical characteristics of the patients with retinoblastoma.

| Case no. | Sex    | Age, months | Optical<br>nerve invasion | Choroidal<br>invasion | Extraocular<br>invasion | Differentiation |
|----------|--------|-------------|---------------------------|-----------------------|-------------------------|-----------------|
| 1        | Male   | 23          | Yes                       | Yes                   | No                      | Poor            |
| 2        | Male   | 25          | No                        | No                    | No                      | Moderate        |
| 3        | Female | 13          | Yes                       | Yes                   | No                      | Moderate        |
| 4        | Male   | 4           | Yes                       | Yes                   | No                      | Poor            |
| 5        | Male   | 16          | Yes                       | Yes                   | No                      | Poor            |
| 6        | Male   | 22          | Yes                       | Yes                   | No                      | Poor            |
| 7        | Female | 7           | Yes                       | No                    | No                      | Moderate        |
| 8        | Male   | 19          | Yes                       | No                    | No                      | Poor            |
| 9        | Female | 8           | Yes                       | Yes                   | No                      | Moderate        |
| 10       | Female | 10          | Yes                       | Yes                   | No                      | Poor            |
